# Supplementary material for: Antibody responses and correlates of protection in the general population after two doses of the ChAdOx1 or BNT162b2 vaccines
Source: PubMed Central journal article supplement (PMC9117148; doi:10.1038/s41591-022-01721-6), 2022-02-14
Supplement: 41591_2022_1721_MOESM1_ESM.pdf [file 41591_2022_1721_MOESM1_ESM.pdf]

---

**Supplementary information**

---

**Antibody responses and correlates of protection in the general population after two doses of the ChAdOx1 or BNT162b2 vaccines**

---

In the format provided by the authors and unedited

## **Supplementary information for**

# **Antibody responses and correlates of protection in the general population after two doses of the ChAdOx1 or BNT162b2 vaccines**

Jia Wei, Koen B. Pouwels, Nicole Stoesser, Philippa C. Matthews, Ian Diamond, Ruth Studley, Emma Rourke, Duncan Cook, John I Bell, John N Newton, Jeremy Farrar, Alison Howarth, Brian D. Marsden, Sarah Hoosdally, E Yvonne Jones, David I Stuart, Derrick W. Crook, Tim E. A. Peto, A. Sarah Walker, David W. Eyre and the COVID-19 Infection Survey team

## **Contents**

- **Supplementary Tables 1-10**
- **Supplementary Figures 1-4**

## Supplementary Tables

|                                                    | ChAdOx1<br>two dose no<br>prior<br>infection<br>(N=121,322) | BNT162b2<br>two dose no<br>prior infection<br>(N=79,693) | ChAdOx1<br>two dose<br>prior<br>infection<br>(N=12,066) | BNT162b2<br>two dose<br>prior<br>infection<br>(N=9,412) | Total<br>(N=222,493) | p value |
|----------------------------------------------------|-------------------------------------------------------------|----------------------------------------------------------|---------------------------------------------------------|---------------------------------------------------------|----------------------|---------|
| <b>Percentage (%)</b>                              | 54.5                                                        | 35.8                                                     | 5.4                                                     | 4.2                                                     | 100                  |         |
| <b>Dosing interval (days)</b>                      |                                                             |                                                          |                                                         |                                                         |                      |         |
| <b>Median</b>                                      | 76                                                          | 71                                                       | 76                                                      | 65                                                      | 74                   |         |
| <b>Q1, Q3</b>                                      | 68, 78                                                      | 58, 77                                                   | 66, 78                                                  | 56, 76                                                  | 64, 78               |         |
| <b>Age (years)</b>                                 |                                                             |                                                          |                                                         |                                                         |                      | < 0.001 |
| <b>Median</b>                                      | 58                                                          | 56                                                       | 53                                                      | 37                                                      | 57                   |         |
| <b>Q1, Q3</b>                                      | 48, 67                                                      | 36, 70                                                   | 45, 62                                                  | 29, 57                                                  | 43, 68               |         |
| <b>Sex</b>                                         |                                                             |                                                          |                                                         |                                                         |                      | < 0.001 |
| <b>Female</b>                                      | 64,470<br>(53.1%)                                           | 44,717<br>(56.1%)                                        | 6,477<br>(53.7%)                                        | 5,202<br>(55.3%)                                        | 120,866<br>(54.3%)   |         |
| <b>Male</b>                                        | 56,852<br>(46.9%)                                           | 34,976<br>(43.9%)                                        | 5,589<br>(46.3%)                                        | 4,210<br>(44.7%)                                        | 101,627 (45.7%)      |         |
| <b>Ethnicity</b>                                   |                                                             |                                                          |                                                         |                                                         |                      | < 0.001 |
| <b>Non-white</b>                                   | 5,698 (4.7%)                                                | 4,858 (6.1%)                                             | 932 (7.7%)                                              | 1,107<br>(11.8%)                                        | 12,595 (5.7%)        |         |
| <b>White</b>                                       | 115,624<br>(95.3%)                                          | 74,835<br>(93.9%)                                        | 11,134<br>(92.3%)                                       | 8,305<br>(88.2%)                                        | 209,898<br>(94.3%)   |         |
| <b>Household size</b>                              |                                                             |                                                          |                                                         |                                                         |                      | < 0.001 |
| <b>1</b>                                           | 22,809<br>(18.8%)                                           | 15,069<br>(18.9%)                                        | 1,928<br>(16.0%)                                        | 1,291<br>(13.7%)                                        | 41,097<br>(18.5%)    |         |
| <b>2</b>                                           | 59,704<br>(49.2%)                                           | 39,965<br>(50.1%)                                        | 5,065<br>(42.0%)                                        | 3,890<br>(41.3%)                                        | 108,624 (48.8%)      |         |
| <b>3</b>                                           | 18,176<br>(15.0%)                                           | 11,691<br>(14.7%)                                        | 2,167<br>(18.0%)                                        | 1,859<br>(19.8%)                                        | 33,893<br>(15.2%)    |         |
| <b>4</b>                                           | 15,215<br>(12.5%)                                           | 9,143 (11.5%)                                            | 2,075<br>(17.2%)                                        | 1,593<br>(16.9%)                                        | 28,026 (12.6%)       |         |
| <b>5+</b>                                          | 5,418 (4.5%)                                                | 3,825 (4.8%)                                             | 831 (6.9%)                                              | 779 (8.3%)                                              | 10,853<br>(4.9%)     |         |
| <b>Deprivation percentile</b>                      |                                                             |                                                          |                                                         |                                                         |                      | < 0.001 |
| <b>Median</b>                                      | 64                                                          | 62                                                       | 60                                                      | 56                                                      | 62                   |         |
| <b>Q1, Q3</b>                                      | 40, 83                                                      | 38, 82                                                   | 35, 81                                                  | 32, 78                                                  | 39, 82               |         |
| <b>Report working in patient facing healthcare</b> |                                                             |                                                          |                                                         |                                                         |                      | < 0.001 |
| <b>No</b>                                          | 119,937<br>(98.9%)                                          | 74,840<br>(93.9%)                                        | 11,805<br>(97.8%)                                       | 8,840<br>(93.9%)                                        | 215,422 (96.8%)      |         |
| <b>Yes</b>                                         | 1,385 (1.1%)                                                | 4,853 (6.1%)                                             | 261 (2.2%)                                              | 572 (6.1%)                                              | 7,071 (3.2%)         |         |
| <b>Report having a long-term health condition</b>  |                                                             |                                                          |                                                         |                                                         |                      | < 0.001 |
| <b>No</b>                                          | 87,034<br>(71.7%)                                           | 56,147<br>(70.5%)                                        | 9,083<br>(75.3%)                                        | 7,415<br>(78.8%)                                        | 159,679<br>(71.8%)   |         |
| <b>Yes</b>                                         | 34,288<br>(28.3%)                                           | 23,546<br>(29.5%)                                        | 2,983<br>(24.7%)                                        | 1,997<br>(21.2%)                                        | 62,814<br>(28.2%)    |         |

**Supplementary Table 1. Characteristics of participants with two vaccine doses and at least one antibody measurement from 91 days before the first vaccination through to 4<sup>th</sup> October.** Continuous variables were compared using Kruskal-Wallis tests, and categorical variables were compared using one-sided Chi-squared tests.

| <b>(a)</b>                   |                        |             |                         |               |                      |               |
|------------------------------|------------------------|-------------|-------------------------|---------------|----------------------|---------------|
| Time from second dose (days) | Dosing interval (days) | Age (years) | Without prior infection |               | With prior infection |               |
|                              |                        |             | ChAdOx1                 | BNT162b2      | ChAdOx1              | BNT162b2      |
| 21                           | 21                     | 60          | NA                      | 276 (236-324) | NA                   | 305 (212-440) |
| 21                           | 56                     | 60          | 159 (147-172)           | 371 (340-405) | 312 (219-443)        | 418 (284-614) |
| 21                           | 70                     | 60          | 175 (168-182)           | 400 (386-415) | 325 (278-380)        | 425 (355-509) |
| 21                           | 84                     | 60          | 169 (161-178)           | 392 (367-418) | 280 (218-360)        | 426 (308-588) |
| 42                           | 21                     | 60          | NA                      | 328 (284-378) | NA                   | 347 (243-495) |
| 42                           | 56                     | 60          | 132 (123-141)           | 357 (324-394) | 277 (197-390)        | 392 (261-587) |
| 42                           | 70                     | 60          | 137 (132-142)           | 375 (359-391) | 294 (251-344)        | 406 (342-481) |
| 42                           | 84                     | 60          | 143 (137-150)           | 356 (330-383) | 274 (215-347)        | 395 (286-547) |
| 63                           | 21                     | 60          | NA                      | 287 (249-331) | NA                   | 371 (260-530) |
| 63                           | 56                     | 60          | 109 (101-116)           | 321 (295-350) | 230 (163-326)        | 372 (241-572) |
| 63                           | 70                     | 60          | 111 (107-115)           | 321 (310-333) | 254 (217-298)        | 379 (318-453) |
| 63                           | 84                     | 60          | 121 (116-127)           | 323 (304-344) | 266 (209-339)        | 395 (288-542) |

  

| <b>(b)</b>                   |                        |             |                         |               |                      |               |
|------------------------------|------------------------|-------------|-------------------------|---------------|----------------------|---------------|
| Time from second dose (days) | Dosing interval (days) | Age (years) | Without prior infection |               | With prior infection |               |
|                              |                        |             | ChAdOx1                 | BNT162b2      | ChAdOx1              | BNT162b2      |
| -49                          | 70                     | 20          | 108 (90-130)            | 295 (208-417) | 351 (317-388)        | 347 (273-440) |
| 21                           | 70                     | 20          | 183 (154-217)           | 317 (225-447) | 404 (362-450)        | 420 (308-574) |
| -49                          | 70                     | 40          | 81 (76-87)              | 247 (203-300) | 219 (208-231)        | 293 (243-353) |
| 21                           | 70                     | 40          | 156 (148-165)           | 289 (241-348) | 394 (377-413)        | 410 (342-492) |
| -49                          | 70                     | 60          | 65 (62-68)              | 255 (216-301) | 142 (135-150)        | 234 (195-282) |
| 21                           | 70                     | 60          | 175 (168-182)           | 325 (278-380) | 400 (386-415)        | 425 (355-509) |
| -49                          | 70                     | 80          | 37 (33-42)              | 112 (85-148)  | 91 (83-100)          | 141 (107-185) |
| 21                           | 70                     | 80          | 175 (160-193)           | 254 (193-334) | 404 (377-432)        | 422 (324-548) |

**Supplementary Table 2. Predicted anti-spike IgG levels (BAU/mL) with 95% confidence interval (CI) from generalised additive models. a,** Comparison of 8-, 10-, 12-, and 3-week dosing interval 21, 42, 63 days after the second dose in 60-year-olds. **b,** Comparison of 20-, 40-, 60-, and 80-year-olds 21 days after the first and second dose in those with 10-week dosing interval. The 95% confidence intervals are calculated by prediction  $\pm$  1.96\*standard error of prediction. Values truncated at 450 BAU/mL counted as =450 BAU/mL.

| <b>(a) Frequency of antibody measurements per participant</b>                    |                |                 |
|----------------------------------------------------------------------------------|----------------|-----------------|
|                                                                                  | <b>ChAdOx1</b> | <b>BNT162b2</b> |
| 1                                                                                | 37,478         | 17,863          |
| 2                                                                                | 39,268         | 16,444          |
| 3                                                                                | 20,450         | 13,839          |
| 4                                                                                | 3,442          | 6,074           |
| 5                                                                                | 1              | 832             |
| 6                                                                                | 0              | 1               |
| <b>(b) Frequency of antibody measurements relative to the second vaccination</b> |                |                 |
| <b>(days)</b>                                                                    | <b>ChAdOx1</b> | <b>BNT162b2</b> |
| 21-28                                                                            | 15,693         | 6,964           |
| 28-35                                                                            | 16,403         | 7,161           |
| 35-42                                                                            | 16,535         | 6,934           |
| 42-49                                                                            | 16,427         | 7,061           |
| 49-56                                                                            | 16,200         | 6,973           |
| 56-63                                                                            | 16,788         | 7,310           |
| 63-70                                                                            | 16,284         | 7,507           |
| 70-77                                                                            | 15,750         | 7,471           |
| 77-84                                                                            | 14,258         | 7,709           |
| 84-91                                                                            | 12,962         | 7,925           |
| 91-98                                                                            | 11,070         | 8,064           |
| 98-105                                                                           | 8,873          | 7,934           |
| 105-112                                                                          | 7,219          | 7,215           |
| 112-119                                                                          | 5,886          | 6,436           |
| 119-126                                                                          | 789            | 5,837           |
| 126-133                                                                          | 0              | 4,721           |
| 133-140                                                                          | 0              | 3,732           |
| 140-147                                                                          | 0              | 2,831           |
| 147-149                                                                          | 0              | 945             |

**Supplementary Table 3. Frequency of antibody measurements per participant and frequency of antibody measurements relative to the time of the second vaccination in the Bayesian linear mixed model.** 100,639 ChAdOx1 participants contributed 191,137 antibody measurements  $\geq 21$  days after the second dose, median (IQR) [range] 2 (1-2) [1-5] measurements per participant. 55,053 BNT162b2 participants contributed 120,728 antibody measurements  $\geq 21$  days after the second dose, median (IQR) [range] 2 (1-3) [1-6] per participant. The antibody measurements were taken a median (IQR) [range] 61 (41-83) [21-119] days after the second vaccination for ChAdOx1 and 79 (51-106) [21-149] days for BNT162b2.

|                                                    |                                                | ChAdOx1        |            |           | BNT162b2       |             |             |
|----------------------------------------------------|------------------------------------------------|----------------|------------|-----------|----------------|-------------|-------------|
|                                                    |                                                | Posterior mean | 95% CrI    |           | Posterior mean | 95% CrI     |             |
| <b>Unadjusted baseline</b>                         | Peak level (Intercept)                         | 184            | 183        | 185       | 959            | 944         | 974         |
|                                                    | IgG half-life (slope)                          | 79             | 78         | 80        | 51             | 50          | 52          |
| <b>Adjusted baseline</b>                           | Peak level (Intercept)                         | 160            | 155        | 162       | 976            | 903         | 1011        |
|                                                    | IgG half-life (slope)                          | 81             | 79         | 83        | 52             | 50          | 53          |
| <b>Age</b>                                         | Peak level: 60 years                           |                |            |           |                |             |             |
|                                                    | IgG half-life: 60 years                        |                |            |           |                |             |             |
|                                                    | Change in peak level: per 10-years older       | <b>3</b>       | <b>2</b>   | <b>4</b>  | <b>-76</b>     | <b>-84</b>  | <b>-68</b>  |
|                                                    | Change in half-life: per 10-years older        | <b>-1</b>      | <b>-1</b>  | <b>0</b>  | 0              | 0           | 0           |
| <b>Sex</b>                                         | Peak level: Female                             |                |            |           |                |             |             |
|                                                    | IgG half-life: Female                          |                |            |           |                |             |             |
|                                                    | Change in peak level: Male                     | <b>-5</b>      | <b>-7</b>  | <b>-3</b> | <b>-140</b>    | <b>-164</b> | <b>-117</b> |
|                                                    | Change in half-life: Male                      | 0              | -1         | 2         | -1             | -2          | 1           |
| <b>Ethnicity</b>                                   | Peak level: White                              |                |            |           |                |             |             |
|                                                    | IgG half-life: White                           |                |            |           |                |             |             |
|                                                    | Change in peak level: Non-white                | <b>41</b>      | <b>36</b>  | <b>47</b> | <b>141</b>     | <b>78</b>   | <b>208</b>  |
|                                                    | Change in half-life: Non-white                 | <b>-8</b>      | <b>-11</b> | <b>-5</b> | 0              | -3          | 2           |
| <b>Report having a long-term health condition</b>  | Peak level: No                                 |                |            |           |                |             |             |
|                                                    | IgG half-life: No                              |                |            |           |                |             |             |
|                                                    | Change in peak level: Yes                      | <b>-5</b>      | <b>-7</b>  | <b>-3</b> | <b>-79</b>     | <b>-104</b> | <b>-55</b>  |
|                                                    | Change in half-life: Yes                       | <b>-2</b>      | <b>-4</b>  | <b>-1</b> | <b>-1</b>      | <b>-2</b>   | <b>0</b>    |
| <b>Report working in patient-facing healthcare</b> | Peak level: No                                 |                |            |           |                |             |             |
|                                                    | IgG half-life: No                              |                |            |           |                |             |             |
|                                                    | Change in peak level: Yes                      | <b>10</b>      | <b>2</b>   | <b>19</b> | <b>287</b>     | <b>221</b>  | <b>358</b>  |
|                                                    | Change in half-life: Yes                       | 0              | -6         | 6         | -5             | -6          | -3          |
| <b>Deprivation</b>                                 | Peak level: 60 (median)                        |                |            |           |                |             |             |
|                                                    | IgG half-life: 60 (median)                     |                |            |           |                |             |             |
|                                                    | Change in peak level: per 10 percentile higher | <b>-1</b>      | <b>-1</b>  | <b>-1</b> | <b>5</b>       | <b>1</b>    | <b>10</b>   |
|                                                    | Change in half-life: per 10 percentile higher  | <b>1</b>       | <b>0</b>   | <b>1</b>  | 0              | 0           | 0           |
| <b>3-week interval</b>                             | Peak level: No                                 |                |            |           |                |             |             |
|                                                    | IgG half-life: No                              |                |            |           |                |             |             |

|                        |                                            |            |            |            |             |             |            |
|------------------------|--------------------------------------------|------------|------------|------------|-------------|-------------|------------|
|                        | Change in 'peak level': Yes (vs 8 weeks) * |            |            |            | <b>-163</b> | <b>-227</b> | <b>-95</b> |
|                        | Change in half-life: Yes (vs 8 weeks)      |            |            |            | <b>6</b>    | <b>2</b>    | <b>10</b>  |
| <b>Dosing interval</b> | Peak level: 8 weeks (median)               |            |            |            |             |             |            |
|                        | IgG half-life: 8 weeks (median)            |            |            |            |             |             |            |
|                        | Change in peak level: per 1 week longer    | <b>6</b>   | <b>5</b>   | <b>7</b>   | <b>12</b>   | <b>1</b>    | <b>23</b>  |
|                        | Change in half-life: per 1 week longer     | 0          | -1         | 0          | 0           | 0           | 1          |
| <b>Prior infection</b> | Peak level: No                             |            |            |            |             |             |            |
|                        | IgG half-life: No                          |            |            |            |             |             |            |
|                        | Change in peak level: Yes                  | <b>219</b> | <b>210</b> | <b>227</b> | <b>312</b>  | <b>248</b>  | <b>381</b> |
|                        | Change in half-life: Yes                   | <b>13</b>  | <b>9</b>   | <b>17</b>  | <b>11</b>   | <b>8</b>    | <b>15</b>  |

**Supplementary Table 4. Posterior mean and 95% credible intervals for anti-spike IgG peak level (intercept) (BAU/mL) and half-life (slope) (days) in the unadjusted models and multivariable models in 100,639 participants with two ChAdOx1 doses and 55,053 participants with two BNT162b2 doses.** The reference categories in the multivariable model are: 60-year-old, female, white ethnicity, not reporting a long-term health condition, not a healthcare worker, deprivation percentile=60, 8-week dosing interval, and no prior infection. Bold numbers indicate an effect not compatible with chance (95% credible interval excludes no effect). \*The predicted peak level in 3-week vs 8-week is extrapolated and for modelling purpose only, it should not be interpreted as an actual peak.

| Days from first vaccination | ChAdOx1 | BNT162b2 |
|-----------------------------|---------|----------|
| 35-49                       | 1,364   | 1,875    |
| 49-63                       | 4,766   | 4,327    |
| 63-77                       | 9,681   | 5,027    |
| 77-91                       | 14,081  | 5,830    |
| 91-105                      | 18,268  | 7,318    |
| 105-119                     | 22,644  | 9,288    |
| 119-133                     | 26,749  | 10,725   |
| 133-147                     | 27,934  | 11,090   |
| 147-161                     | 28,251  | 12,327   |
| 161-175                     | 27,636  | 13,392   |
| 175-189                     | 26,770  | 14,111   |
| 189-203                     | 21,210  | 14,195   |
| 203-217                     | 14,786  | 13,397   |
| 217-231                     | 10,285  | 11,202   |
| 231-245                     | 4,640   | 7,638    |
| 245-259                     | 993     | 3,966    |
| 259-273                     | 65      | 1,673    |
| 273-287                     | 1       | 647      |
| 287-298                     | 0       | 103      |

**Supplementary Table 5. Frequency of visits relative to the time of the first vaccination in the generalised additive models estimating correlates of protection.** Study visits were included from 17<sup>th</sup> May 2021 to 4<sup>th</sup> October 2021, i.e. while the Delta variant accounted for nearly all cases. The median (IQR) [range] was 149 (115-182) [36-273] days for ChAdOx1 and 167 (123-204) [35-298] days for BNT162b2. Note that UK started its booster programme from 16<sup>th</sup> September 2021, so a small number of visits occurred in the first two weeks after initiating the booster campaign.



| a)                    |                                                                                                                                                              | ChAdOx1                    |                        |                | BNT162b2                   |                        |                |
|-----------------------|--------------------------------------------------------------------------------------------------------------------------------------------------------------|----------------------------|------------------------|----------------|----------------------------|------------------------|----------------|
|                       |                                                                                                                                                              | Total                      | Non-responder          | %              | Total                      | Non-responder          | %              |
| First dose            | At least one antibody measurement $\geq$ 21 days after first dose and before second dose                                                                     | 57,650                     | 4,280                  | 7.4            | 30,843                     | 1,374                  | 4.5            |
|                       | Two or more antibody measurements, including at least one antibody measurement $\geq$ 21 days after first dose and before second dose                        | 29,277                     | 1,706                  | 5.8            | 15,525                     | 546                    | 3.5            |
| Second dose           | At least one antibody measurement $\geq$ 21 days after second dose                                                                                           | 100,776                    | 1,010                  | 1              | 57,313                     | 312                    | 0.5            |
|                       | Two or more antibody measurements, including at least one antibody measurement $\geq$ 21 days after second dose                                              | 77,947                     | 496                    | 0.6            | 44,311                     | 146                    | 0.3            |
| b)                    |                                                                                                                                                              | ChAdOx1                    |                        |                | BNT162b2                   |                        |                |
| First and second dose | At least one Ab measurement $\geq$ 21 days after first dose and before second dose, and after second dose                                                    | Second dose: non-responder | Second dose: responder | Total          | Second dose: non-responder | Second dose: responder | Total          |
|                       | First dose: non-responder                                                                                                                                    | 192 (0.5%)                 | 3,243 (7.2%)           | 3,435 (7.7%)   | 37 (0.2%)                  | 1,036 (5.8%)           | 1,073 (6.0%)   |
|                       | First dose: responder                                                                                                                                        | 99 (0.2%)                  | 41,212 (92.1%)         | 41,311 (92.3%) | 15 (0.1%)                  | 16,909 (93.9%)         | 16,924 (94.0%) |
|                       | Total                                                                                                                                                        | 291 (0.7%)                 | 44,455 (99.3%)         | 44,746 (100%)  | 52 (0.3%)                  | 17,945 (99.7%)         | 17,997 (100%)  |
|                       | Two or more antibody measurements, including at least one antibody measurement $\geq$ 21 days after first dose and before second dose, and after second dose | Second dose: non-responder | Second dose: responder | Total          | Second dose: non-responder | Second dose: responder | Total          |
|                       | First dose: non-responder                                                                                                                                    | 59 (0.3%)                  | 1,092 (5.7%)           | 1,151 (6.0%)   | 8 (0.1%)                   | 364 (5.1%)             | 372 (5.2%)     |
|                       | First dose: responder                                                                                                                                        | 10 (0.1%)                  | 17,965 (93.9%)         | 17,975 (94.0%) | 0 (0%)                     | 6,731 (94.8%)          | 6,731 (94.8%)  |
|                       | Total                                                                                                                                                        | 69 (0.4%)                  | 19,057 (99.6%)         | 19,126 (100%)  | 8 (0.1%)                   | 7,095 (99.9%)          | 7,103 (100%)   |

**Supplementary Table 6. Percentages of non-responders to first or second dose of ChAdOx1 or BNT162b2 using a heuristic rule as all antibody measurements being <16 BAU/mL and having at least one antibody measurement 21 days after the first or second dose. a, Non-responders in those who had antibody measurements after first dose or second dose. b, Non-responders in those who had antibodies measured after both first and second dose by responses to each dose. To examine the robustness of this definition, this rule was further applied in those having at least two antibody measurements.**

|                                                    | Responders<br>(N=215,746) | Non-responders<br>(N=6,747) | Total (N=222,493) | p value |
|----------------------------------------------------|---------------------------|-----------------------------|-------------------|---------|
| <b>Dosing interval (days)</b>                      |                           |                             |                   | < 0.001 |
| <b>Median</b>                                      | 74                        | 77                          | 74                |         |
| <b>Q1, Q3</b>                                      | 64, 78                    | 70, 79                      | 64, 78            |         |
| <b>Age (years)</b>                                 |                           |                             |                   | < 0.001 |
| <b>Median</b>                                      | 56                        | 63                          | 57                |         |
| <b>Q1, Q3</b>                                      | 43, 67                    | 53, 72                      | 43, 68            |         |
| <b>Sex</b>                                         |                           |                             |                   | < 0.001 |
| <b>Female</b>                                      | 11,7859 (54.6%)           | 3,007 (44.6%)               | 120,866 (54.3%)   |         |
| <b>Male</b>                                        | 97,887 (45.4%)            | 3,740 (55.4%)               | 101,627 (45.7%)   |         |
| <b>Ethnicity</b>                                   |                           |                             |                   | < 0.001 |
| <b>Non-white</b>                                   | 12,383 (5.7%)             | 212 (3.1%)                  | 12,595 (5.7%)     |         |
| <b>White</b>                                       | 203,363 (94.3%)           | 6,535 (96.9%)               | 209,898 (94.3%)   |         |
| <b>Household size</b>                              |                           |                             |                   | < 0.001 |
| <b>1</b>                                           | 39,556 (18.3%)            | 1,541 (22.8%)               | 41,097 (18.5%)    |         |
| <b>2</b>                                           | 105,134 (48.7%)           | 3,490 (51.7%)               | 108,624 (48.8%)   |         |
| <b>3</b>                                           | 33,046 (15.3%)            | 847 (12.6%)                 | 33,893 (15.2%)    |         |
| <b>4</b>                                           | 27,405 (12.7%)            | 621 (9.2%)                  | 28,026 (12.6%)    |         |
| <b>5+</b>                                          | 10,605 (4.9%)             | 248 (3.7%)                  | 10,853 (4.9%)     |         |
| <b>Deprivation percentile</b>                      |                           |                             |                   | < 0.001 |
| <b>Median</b>                                      | 63                        | 60                          | 62                |         |
| <b>Q1, Q3</b>                                      | 39, 82                    | 36, 81                      | 39, 82            |         |
| <b>Report working in patient facing healthcare</b> |                           |                             |                   | < 0.001 |
| <b>No</b>                                          | 208,765 (96.8%)           | 6,657 (98.7%)               | 215,422 (96.8%)   |         |
| <b>Yes</b>                                         | 6,981 (3.2%)              | 90 (1.3%)                   | 7,071 (3.2%)      |         |
| <b>Report having a long-term health condition</b>  |                           |                             |                   | < 0.001 |
| <b>No</b>                                          | 156,009 (72.3%)           | 3,670 (54.4%)               | 159,679 (71.8%)   |         |
| <b>Yes</b>                                         | 59,737 (27.7%)            | 3,077 (45.6%)               | 62,814 (28.2%)    |         |

**Supplementary Table 7. Comparison of the characteristics of responders with non-responders to first or second dose of ChAdOx1 or BNT162b2.** Non-responders were identified using a heuristic rule as all antibody measurements being <15 BAU/mL and having at least one antibody measurement 21 days after the first or second dose. Continuous variables were compared using Kruskal-Wallis tests, and categorical variables were compared using one-sided Chi-squared tests.

| Number of antibody measurements                    | 0 (N=179,855)   | 1-2 (N=92,397) | 3-4 (N=78,565) | ≥5 (N=51,531)  | Total (N=402,348) |
|----------------------------------------------------|-----------------|----------------|----------------|----------------|-------------------|
| <b>Dosing interval (days)</b>                      |                 |                |                |                |                   |
| Median                                             | 74              | 74             | 74             | 75             | 74                |
| Q1, Q3                                             | 62, 78          | 63, 78         | 64, 77         | 67, 78         | 63, 78            |
| <b>Age (years)</b>                                 |                 |                |                |                |                   |
| Median                                             | 55              | 54             | 56             | 60             | 56                |
| Q1, Q3                                             | 39, 69          | 41, 67         | 43, 67         | 49, 69         | 41, 68            |
| <b>Sex</b>                                         |                 |                |                |                |                   |
| Female                                             | 95,435 (53.1%)  | 49,544 (53.6%) | 42,821 (54.5%) | 28,501 (55.3%) | 216,301 (53.8%)   |
| Male                                               | 84,420 (46.9%)  | 42,853 (46.4%) | 35,744 (45.5%) | 23,030 (44.7%) | 186,047 (46.2%)   |
| <b>Ethnicity</b>                                   |                 |                |                |                |                   |
| Non-white                                          | 13,874 (7.7%)   | 5,099 (5.5%)   | 4,521 (5.8%)   | 2,974 (5.8%)   | 26,468 (6.6%)     |
| White                                              | 165,981 (92.3%) | 87,298 (94.5%) | 74,044 (94.2%) | 48,557 (94.2%) | 375,880 (93.4%)   |
| <b>Household size</b>                              |                 |                |                |                |                   |
| 1                                                  | 36,725 (20.4%)  | 15,928 (17.2%) | 14,239 (18.1%) | 10,930 (21.2%) | 77,822 (19.3%)    |
| 2                                                  | 82,100 (45.6%)  | 43,323 (46.9%) | 38,341 (48.8%) | 26,960 (52.3%) | 190,724 (47.4%)   |
| 3                                                  | 27,952 (15.5%)  | 14,580 (15.8%) | 12,301 (15.7%) | 7,012 (13.6%)  | 61,845 (15.4%)    |
| 4                                                  | 22,978 (12.8%)  | 12,970 (14.0%) | 10,027 (12.8%) | 5,029 (9.8%)   | 51,004 (12.7%)    |
| 5+                                                 | 10,100 (5.6%)   | 5,596 (6.1%)   | 3,657 (4.7%)   | 1,600 (3.1%)   | 20,953 (5.2%)     |
| <b>Deprivation percentile</b>                      |                 |                |                |                |                   |
| Median                                             | 61              | 63             | 62             | 63             | 62                |
| Q1, Q3                                             | 37, 81          | 40, 82         | 38, 82         | 39, 83         | 38, 82            |
| <b>Report working in patient facing healthcare</b> |                 |                |                |                |                   |
| No                                                 | 175,361 (97.5%) | 89,467 (96.8%) | 76,008 (96.7%) | 49,947 (96.9%) | 390,783 (97.1%)   |
| Yes                                                | 4,494 (2.5%)    | 2,930 (3.2%)   | 2,557 (3.3%)   | 1,584 (3.1%)   | 11,565 (2.9%)     |
| <b>Report having a long-term health condition</b>  |                 |                |                |                |                   |
| No                                                 | 130,595 (72.6%) | 67,246 (72.8%) | 56,574 (72.0%) | 35,859 (69.6%) | 290,274 (72.1%)   |
| Yes                                                | 49,260 (27.4%)  | 25,151 (27.2%) | 21,991 (28.0%) | 15,672 (30.4%) | 112,074 (27.9%)   |

**Supplementary Table 8. Comparison of the characteristics of all participants ≥16 years in the COVID-19 Infection Survey who received two ChAdOx1 or two BNT162b2 vaccinations from 8<sup>th</sup> December 2020 to 4<sup>th</sup> October 2021 by number of antibody measurements.** 179,855 participants did not provide blood samples for antibody testing. 222,493 participants provided blood samples (92,397 had 1-2 measurements, 78,565 had 3-4 measurements, and 51,531 had ≥5 measurements) and were included in the analyses.

| Model term                                                       | Priors for ChAdOx1   | Priors for BNT162b2  |
|------------------------------------------------------------------|----------------------|----------------------|
| Intercept                                                        | normal (7.5,1)       | normal (9.5, 1)      |
| Slope                                                            | normal (0, 0.1)      | normal (0, 0.1)      |
| Coefficient for change in intercept (age)                        | normal (0, 1)        | normal (0, 1)        |
| Coefficient for change in slope (age)                            | normal (0, 0.1)      | normal (0, 0.1)      |
| Coefficient for change in intercept (sex)                        | normal (0, 1)        | normal (0, 1)        |
| Coefficient for change in slope (sex)                            | normal (0, 0.1)      | normal (0, 0.1)      |
| Coefficient for change in intercept (ethnicity)                  | normal (0, 1)        | normal (0, 1)        |
| Coefficient for change in slope (ethnicity)                      | normal (0, 0.1)      | normal (0, 0.1)      |
| Coefficient for change in intercept (long-term health condition) | normal (0, 1)        | normal (0, 1)        |
| Coefficient for change in slope (long-term health condition)     | normal (0, 0.1)      | normal (0, 0.1)      |
| Coefficient for change in intercept (healthcare worker)          | normal (0, 1)        | normal (0, 1)        |
| Coefficient for change in slope (healthcare worker)              | normal (0, 0.1)      | normal (0, 0.1)      |
| Coefficient for change in intercept (deprivation)                | normal (0, 1)        | normal (0, 1)        |
| Coefficient for change in slope (deprivation)                    | normal (0, 0.01)     | normal (0, 0.01)     |
| Coefficient for change in intercept (3-week interval)            | normal (0, 1)        | normal (0, 1)        |
| Coefficient for change in slope (3-week interval)                | normal (0, 0.1)      | normal (0, 0.1)      |
| Coefficient for change in intercept (dosing interval)            | normal (0, 1)        | normal (0, 1)        |
| Coefficient for change in slope (dosing interval)                | normal (0, 0.1)      | normal (0, 0.1)      |
| Coefficient for change in intercept (prior infection)            | normal (0, 1)        | normal (0, 1)        |
| Coefficient for change in slope (prior infection)                | normal (0, 0.1)      | normal (0, 0.1)      |
| Random effect SD: intercept                                      | cauchy(0, 0.5)       | cauchy(0, 0.5)       |
| Random effect SD: slope                                          | cauchy(0, 0.01)      | cauchy(0, 0.01)      |
| Random effect intercept & slope covariance                       | lkj_corr_cholesky(2) | lkj_corr_cholesky(2) |

**Supplementary Table 9. Priors used in the Bayesian linear mixed interval-censored models.** Age (16-85 years) and deprivation percentile (0-100) were scaled by dividing by 10; dosing interval (42-91 days) was scaled by dividing by 7.

|                     |                      | Estimate | Est.Error | 95%CrI  |         | Rhat   | Bulk_ESS | Tail_ESS |
|---------------------|----------------------|----------|-----------|---------|---------|--------|----------|----------|
| <b>ChAdOx1</b>      | Intercept            | 7.3174   | 0.0111    | 7.2951  | 7.3391  | 1.0023 | 1375     | 2882     |
|                     | time                 | -0.0124  | 0.0002    | -0.0127 | -0.0121 | 1.0000 | 6611     | 5322     |
|                     | age                  | 0.0254   | 0.0034    | 0.0187  | 0.0321  | 1.0024 | 1593     | 3235     |
|                     | sex                  | -0.0466  | 0.0083    | -0.0631 | -0.0306 | 1.0015 | 1399     | 2808     |
|                     | ethnicity            | 0.3331   | 0.0202    | 0.2946  | 0.3737  | 1.0040 | 1501     | 2532     |
|                     | lthc                 | -0.0450  | 0.0093    | -0.0632 | -0.0267 | 1.0049 | 1102     | 2022     |
|                     | hcw                  | 0.0903   | 0.0374    | 0.0164  | 0.1634  | 1.0017 | 1509     | 2453     |
|                     | deprivation          | -0.0103  | 0.0016    | -0.0134 | -0.0072 | 1.0018 | 1550     | 2878     |
|                     | dosing interval      | 0.0524   | 0.0036    | 0.0454  | 0.0593  | 1.0020 | 1560     | 2920     |
|                     | prior infection      | 1.2453   | 0.0158    | 1.2146  | 1.2765  | 1.0038 | 1746     | 3266     |
|                     | time:age             | -0.0001  | 0.0000    | -0.0002 | 0.0000  | 1.0014 | 6671     | 6023     |
|                     | time:sex             | 0.0001   | 0.0001    | -0.0001 | 0.0003  | 1.0006 | 6612     | 6153     |
|                     | time:ethnicity       | -0.0013  | 0.0003    | -0.0019 | -0.0008 | 1.0004 | 5712     | 5471     |
|                     | time:lthc            | -0.0004  | 0.0001    | -0.0006 | -0.0001 | 1.0005 | 6501     | 5556     |
|                     | time:hcw             | -0.0001  | 0.0005    | -0.0010 | 0.0008  | 1.0005 | 6041     | 4866     |
|                     | time:deprivation     | 0.0001   | 0.0000    | 0.0001  | 0.0001  | 1.0007 | 7110     | 5923     |
|                     | time:dosing interval | -0.0001  | 0.0001    | -0.0002 | 0.0000  | 1.0002 | 6541     | 5819     |
|                     | time:prior infection | 0.0017   | 0.0002    | 0.0012  | 0.0021  | 1.0000 | 6010     | 5228     |
|                     | sigma                | 0.4757   | 0.0014    | 0.4729  | 0.4785  | 1.0131 | 400      | 677      |
|                     | sd(Intercept)        | 1.0101   | 0.0028    | 1.0045  | 1.0157  | 1.0100 | 1090     | 2678     |
| sd(time)            | 0.0017               | 0.0002   | 0.0013    | 0.0022  | 1.0170  | 319    | 387      |          |
| cor(Intercept,time) | -0.2679              | 0.0159   | -0.2983   | -0.2367 | 1.0001  | 3372   | 4253     |          |
| <b>BNT162b2</b>     | Intercept            | 9.9300   | 0.0259    | 9.8796  | 9.9810  | 1.0003 | 3553     | 4861     |
|                     | time                 | -0.0194  | 0.0003    | -0.0200 | -0.0188 | 1.0004 | 6401     | 6408     |
|                     | age                  | -0.1167  | 0.0065    | -0.1297 | -0.1040 | 1.0003 | 4746     | 6190     |
|                     | sex                  | -0.2235  | 0.0187    | -0.2600 | -0.1868 | 1.0007 | 4743     | 6293     |
|                     | ethnicity            | 0.1944   | 0.0430    | 0.1106  | 0.2788  | 1.0010 | 4377     | 5850     |
|                     | lthc                 | -0.1222  | 0.0196    | -0.1601 | -0.0843 | 1.0006 | 4213     | 5716     |
|                     | hcw                  | 0.3717   | 0.0397    | 0.2961  | 0.4521  | 1.0019 | 4062     | 4894     |
|                     | deprivation          | 0.0075   | 0.0034    | 0.0007  | 0.0143  | 1.0006 | 4495     | 6470     |
|                     | 3-week               | -0.2638  | 0.0571    | -0.3754 | -0.1489 | 1.0002 | 3648     | 5632     |
|                     | dosing interval      | 0.0183   | 0.0085    | 0.0017  | 0.0351  | 1.0002 | 3599     | 5597     |
|                     | prior infection      | 0.4002   | 0.0377    | 0.3270  | 0.4747  | 1.0000 | 4529     | 5485     |
|                     | time:age             | 0.0000   | 0.0001    | -0.0001 | 0.0002  | 1.0003 | 7850     | 6895     |
|                     | time:sex             | -0.0002  | 0.0002    | -0.0006 | 0.0002  | 1.0003 | 8799     | 6686     |
|                     | time:ethnicity       | -0.0002  | 0.0005    | -0.0012 | 0.0008  | 1.0007 | 7573     | 6634     |
|                     | time:lthc            | -0.0005  | 0.0002    | -0.0009 | 0.0000  | 1.0009 | 8150     | 6849     |
|                     | time:hcw             | -0.0019  | 0.0004    | -0.0027 | -0.0011 | 1.0012 | 6397     | 6317     |
|                     | time:deprivation     | 0.0000   | 0.0000    | -0.0001 | 0.0001  | 1.0013 | 9273     | 6197     |
|                     | time:3-week          | 0.0019   | 0.0006    | 0.0007  | 0.0031  | 0.9999 | 5061     | 6104     |
|                     | time:dosing interval | 0.0001   | 0.0001    | -0.0001 | 0.0003  | 1.0010 | 7100     | 6346     |
|                     | time:prior infection | 0.0035   | 0.0005    | 0.0025  | 0.0044  | 0.9998 | 7001     | 6688     |
| sigma               | 0.8319               | 0.0036   | 0.8248    | 0.8389  | 1.0027  | 1982   | 4821     |          |
| sd(Intercept)       | 1.1414               | 0.0122   | 1.1175    | 1.1655  | 1.0032  | 2434   | 4901     |          |
| sd(time)            | 0.0027               | 0.0002   | 0.0023    | 0.0032  | 1.0180  | 315    | 396      |          |
| cor(Intercept,time) | -0.9189              | 0.0447   | -0.9882   | -0.8234 | 1.0203  | 283    | 324      |          |

**Supplementary Table 10. Model coefficients and MCMC diagnostics for the multivariable Bayesian linear mixed models.**

## Supplementary Figures

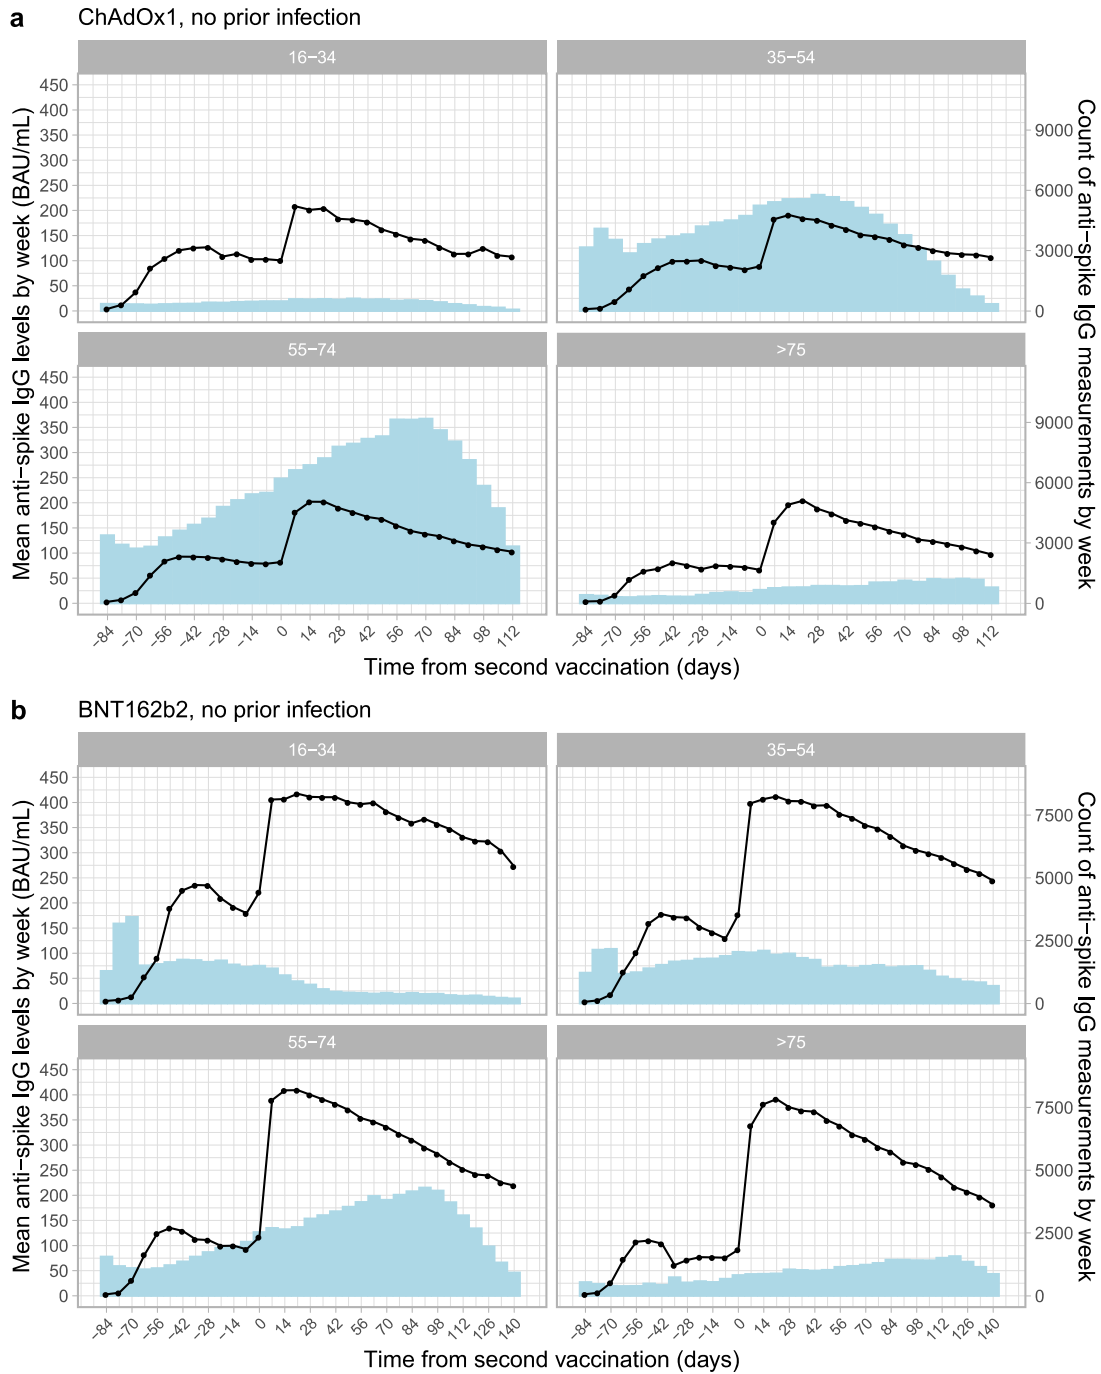

**Supplementary Fig. 1. Unadjusted mean anti-spike IgG levels (BAU/mL) and count of IgG measurements by week from second vaccination in those without prior infection.** Plots are separated by age group (16-34, 35-54, 55-74, and  $\geq 75$  years) and are not separated by dosing intervals. **a**, in those who received two ChAdOx1 vaccinations. **b**, in those who received two BNT162b2 vaccinations. Values truncated at 450 BAU/mL counted as =450 BAU/mL.

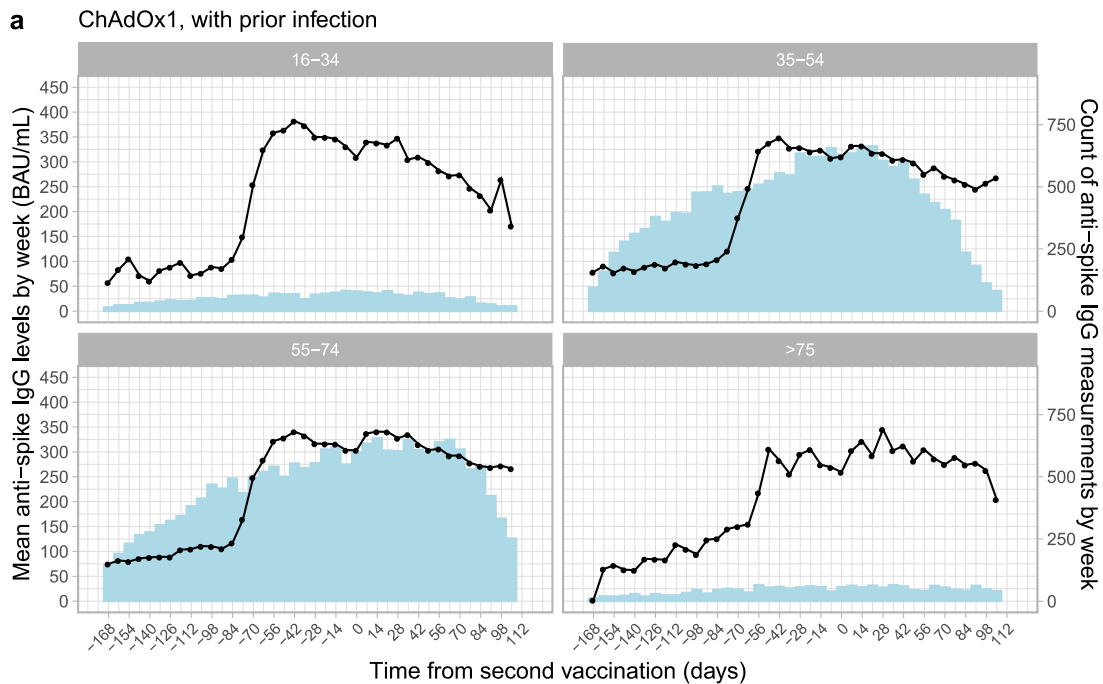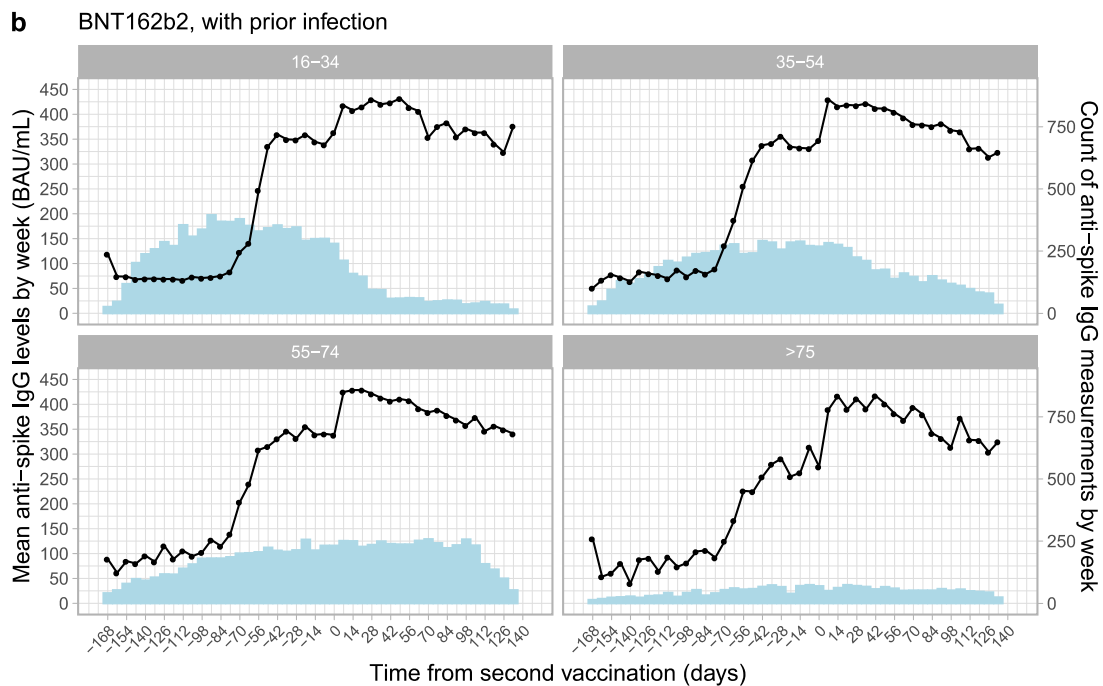

**Supplementary Fig. 2. Unadjusted mean anti-spike IgG levels (BAU/mL) and count of IgG measurements by week from second vaccination in those with prior infection.** Plots are separated by age group (16-34, 35-54, 55-74, and  $\geq 75$  years) and are not separated by dosing intervals. **a**, in those who received two ChAdOx1 vaccinations. **b**, in those who received two BNT162b2 vaccinations. Values truncated at 450 BAU/mL counted as =450 BAU/mL.



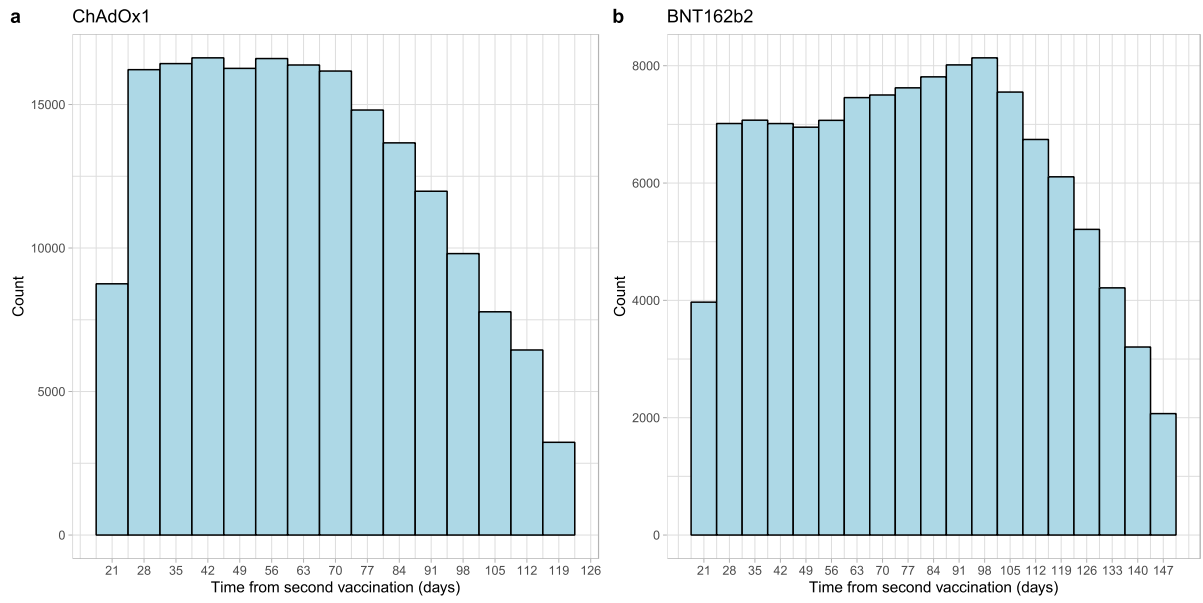

**Supplementary Fig. 3. Distribution of antibody measurements relative to the time of the second vaccination in the Bayesian linear mixed model.** The median (IQR) [range] was 61 (41-83) [21-119] days for ChAdOx1 and 79 (51-106) [21-149] days for BNT162b2.

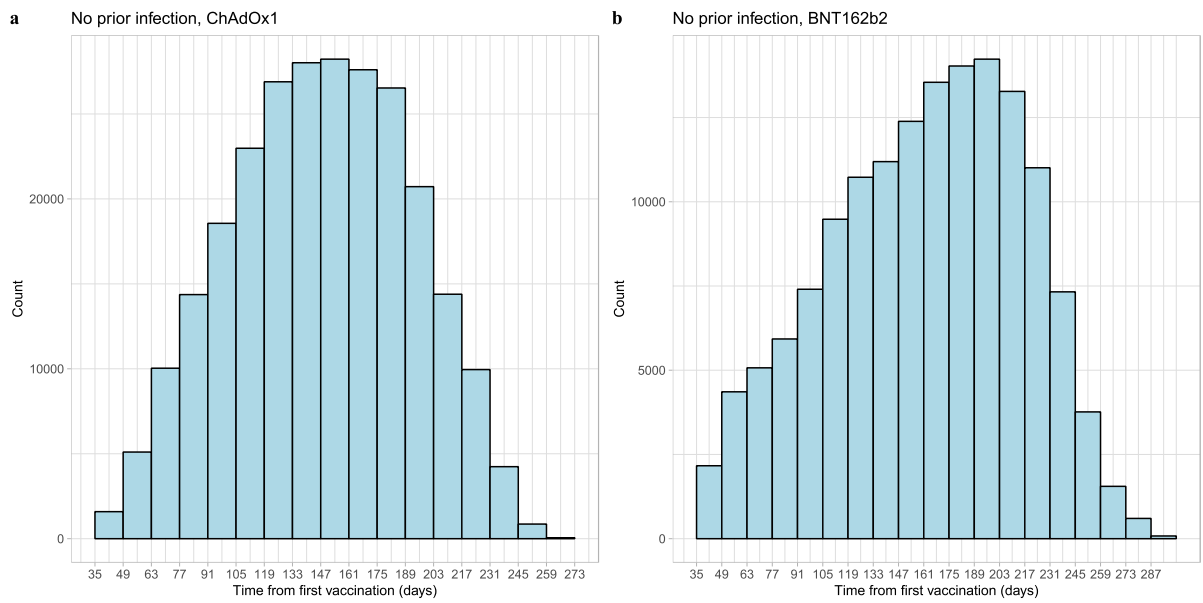

**Supplementary Fig. 4. Distribution of study visits relative to the time of the first vaccination in the generalised additive models estimating correlates of protection.** Study visits were included from 17<sup>th</sup> May 2021 to 4<sup>th</sup> October 2021, i.e. while the Delta variant accounted for nearly all cases. The median (IQR) [range] was 149 (115-182) [36-273] days for ChAdOx1 and 167 (123-204) [35-298] days for BNT162b2.
